# Supplementary material
Source: Springer Nature journal article supplement (https://www.springermedizin.de/resource/supplementary/12936_2006_265_MOESM1_ESM.pdf/9547340)
Supplement: MOESM1 [file 9547340]

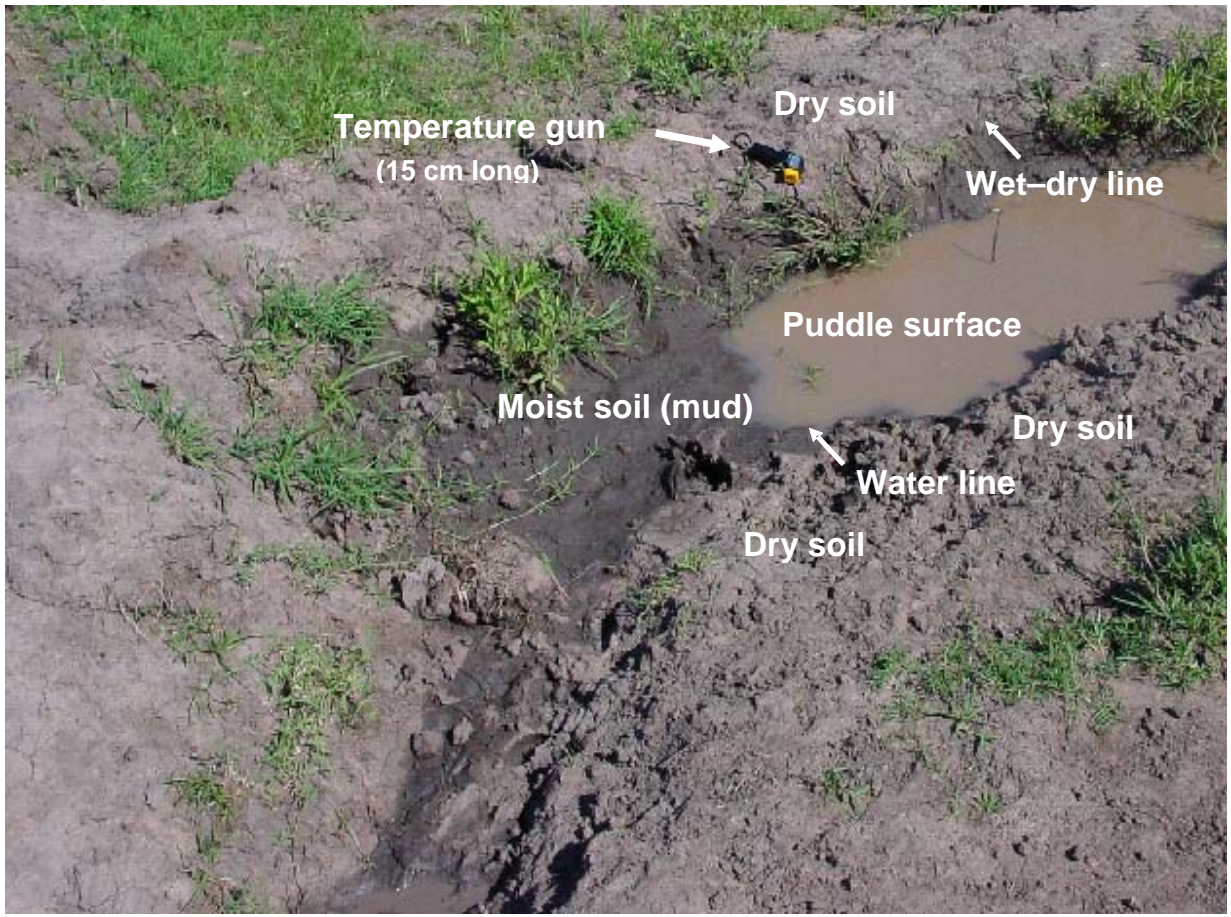

Temperature gun  
(15 cm long)

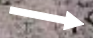

Dry soil

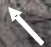

Wet-dry line

Puddle surface

Moist soil (mud)

Dry soil

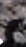

Water line

Dry soil
